# Supplementary material for: The Sweet Potato K+ Transporter IbHAK11 Regulates K+ Deficiency and High Salinity Stress Tolerance by Maintaining Positive Ion Homeostasis
Source: MDPI journal article supplement (doi:10.3390/plants12132422), 2023-06-23
Supplement: s1 [file s1]

**Table S1.** Primers used in this study

| Primer name     | Primer ssequence (5'→3')          |
|-----------------|-----------------------------------|
| IbActin-F:      | AGCAGCATGAAGATTAAGGTTGTAGCAC      |
| IbActin-R:      | TGGAAAATTAGAAGCACTTCCTGTGAAC      |
| IbKUP11-qPCR-F: | CCTTTTGAAGATGAATAACAGC            |
| IbKUP11-qPCR-R: | CTGCTTGCTCTAATGACTGTG             |
| IbKUP11-SacI-F: | CGAGCTCATGCTGGTCACCACTTCTGAT      |
| IbKUP11-XbaI-R: | GCTCTAGATACATAGAAAATCTGTCCAACATTC |
| IbHAK11-T-F:    | GGTCGCGGAGGCTATGGATGC             |
| IbHAK11-T-R:    | GCTTCTGCGGGCGATTTGTGT             |
| Atactin-F       | GCACCCTGTTCTTCTTACCGA             |
| Atactin-R       | AGTAAGGTCACGTCCAGCAAGG            |
| AtCAT-F         | GCAACTACCCCGAGTGGAAG              |
| AtCAT-R         | TGTTTCAGAACCAAGCGACCA             |
| AtGPX8-F        | ATGGCGACGAAGGAACCAG               |
| AtGPX8-R        | ATCGCCGAAGATCCCCATT               |
| AtP5CS-F        | ATGATCTTATTTATGTTCTGC             |
| AtP5CS-R        | CACTATCTTCCGTCCTAT                |
| AtP5CR-F        | AGTTTAGCTTCACAGACCGTTC            |
| AtP5CR-R        | GCTCTGTGAGAGCTCGCGGCTTC           |
| AtDHAR-F        | ATGGTCCTTTTATCGCCGGG              |
| AtDHAR-R        | GCCCATCCAGAGATCACACA              |
| AtAPX-F         | CTCTGGGACGATGCCACAAG              |
| AtAPX-R         | CTCGACCAAAGGACGGAAAA              |
| AtPOD-F         | TCCGGGAGCCACACCATTGG              |
| AtPOD-R         | TGGTCGGAATTCAACAG                 |
| AtSOD-F         | ATGAGAAGTTCTATGAAGAG              |
| AtSOD-R         | GTCTTTATGTAATCTGGT                |

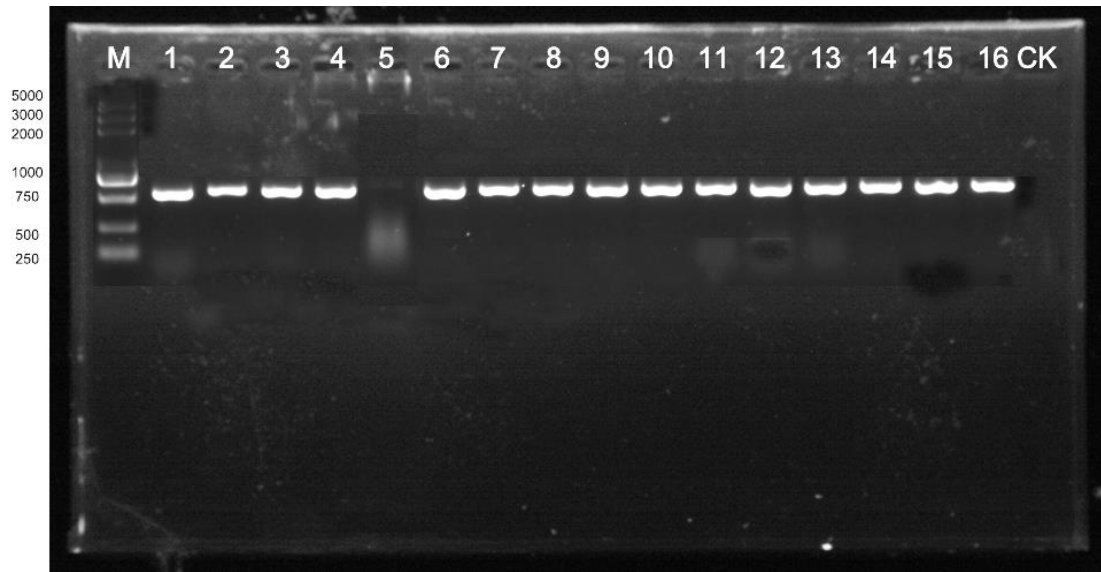

**Figure S1.** PCR identification of *IbHAK11* transgenic plants. M, DNA marker; CK, negative control; 1-16, candidate transgenic plants.
